# Supplementary material
Source: publisher figshare collection journal article supplement (https://tandf.figshare.com/ndownloader/files/17427053)

## Supporting Information for

### **Synthesis of Water-Soluble Fluorescent Polymeric Glycoconjugate for the Detection of Cholera Toxin**

Lijuan Feng<sup>a\*</sup>, Mingjun Zhong<sup>b</sup>, Shizhen Zhang<sup>c</sup>, Min Wang<sup>a</sup>, Zhi-Yong Sun<sup>a</sup>, Qi Chen<sup>b\*</sup>

*<sup>a</sup> Department of Bioengineering, Zunyi Medical University (Zhuhai Campus), Zhuhai 519041, China*

*<sup>b</sup> State Key Laboratory of Marine Resource Utilization in South China Sea, Hainan University, Haikou 570228, China*

*<sup>c</sup> Institute for Interdisciplinary Research, Jiangnan University, Wuhan 430056, China*

\*Corresponding authors. E-mail: [fljcycz@126.com](mailto:fljcycz@126.com) (L.Feng), [chenqi@hainanu.edu.cn](mailto:chenqi@hainanu.edu.cn) (Q. Chen).

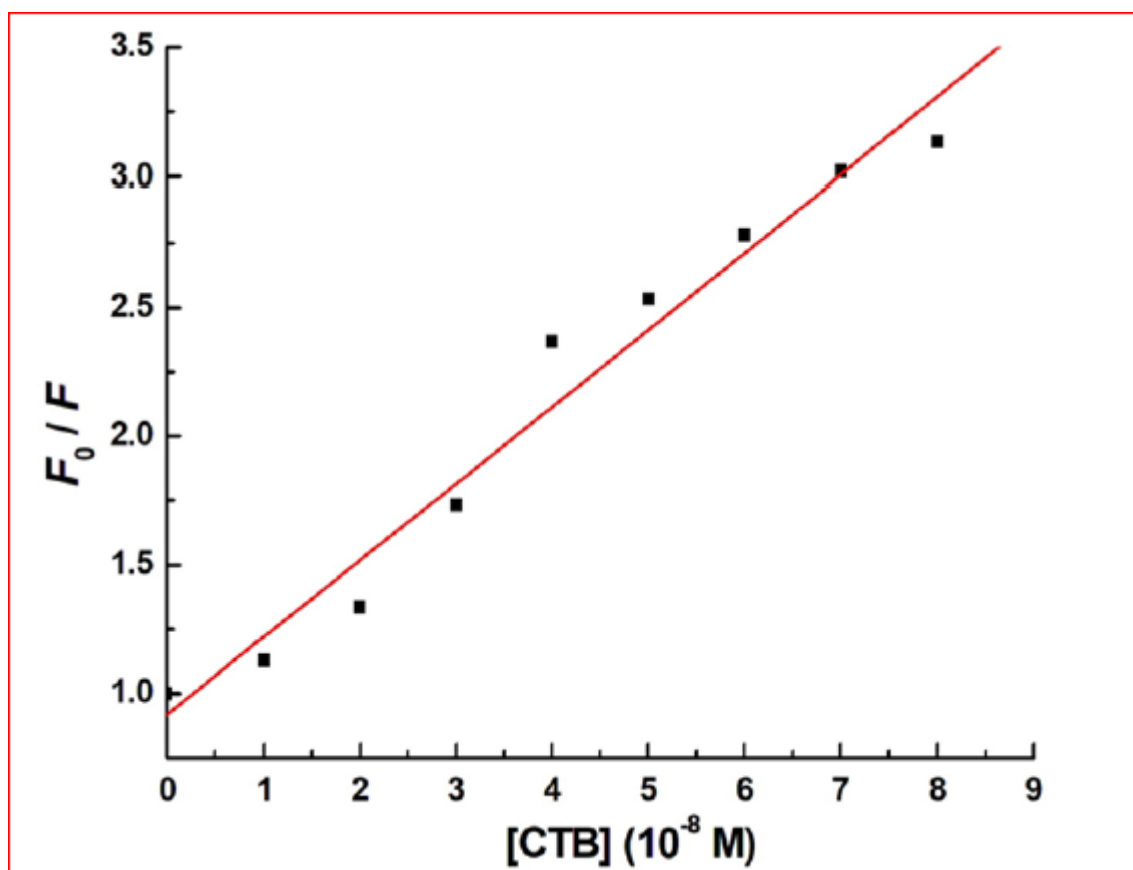

Figure S1. The changed fluorescent intensity as a function of quencher CTB concentration ( $F_0$  is the fluorescent intensity in the absence of quencher,  $F$  is the fluorescent intensity as a function of quencher concentration  $[CTB]$ ).

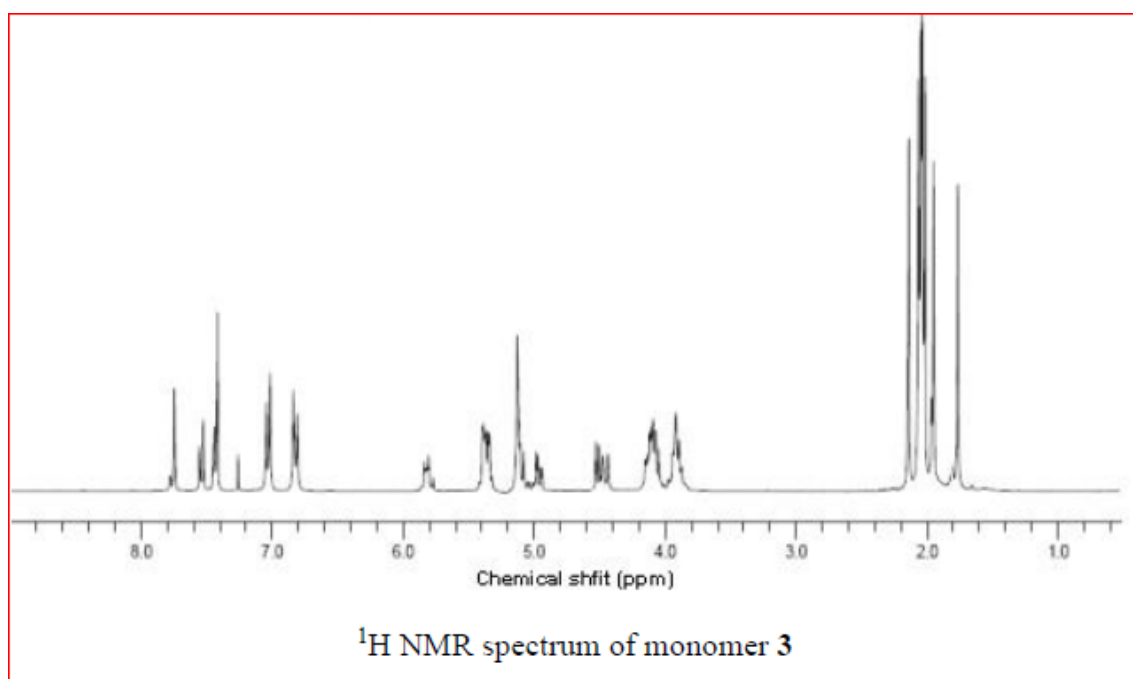

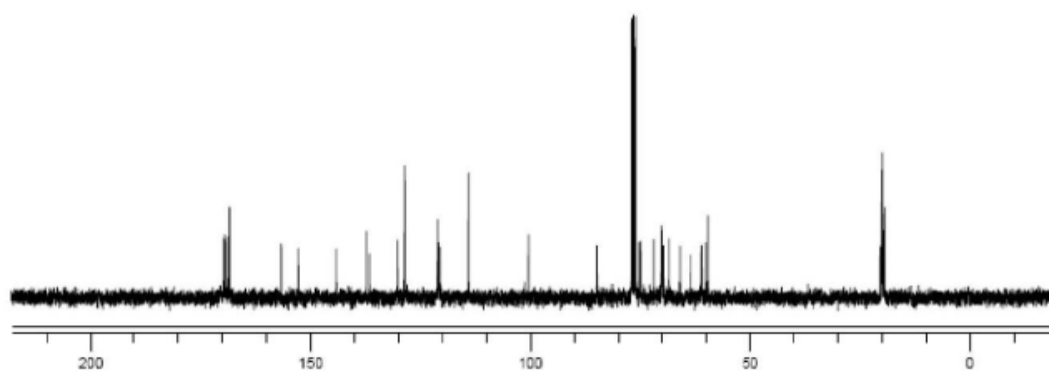

$^{13}\text{C}$  NMR spectrum of monomer 3

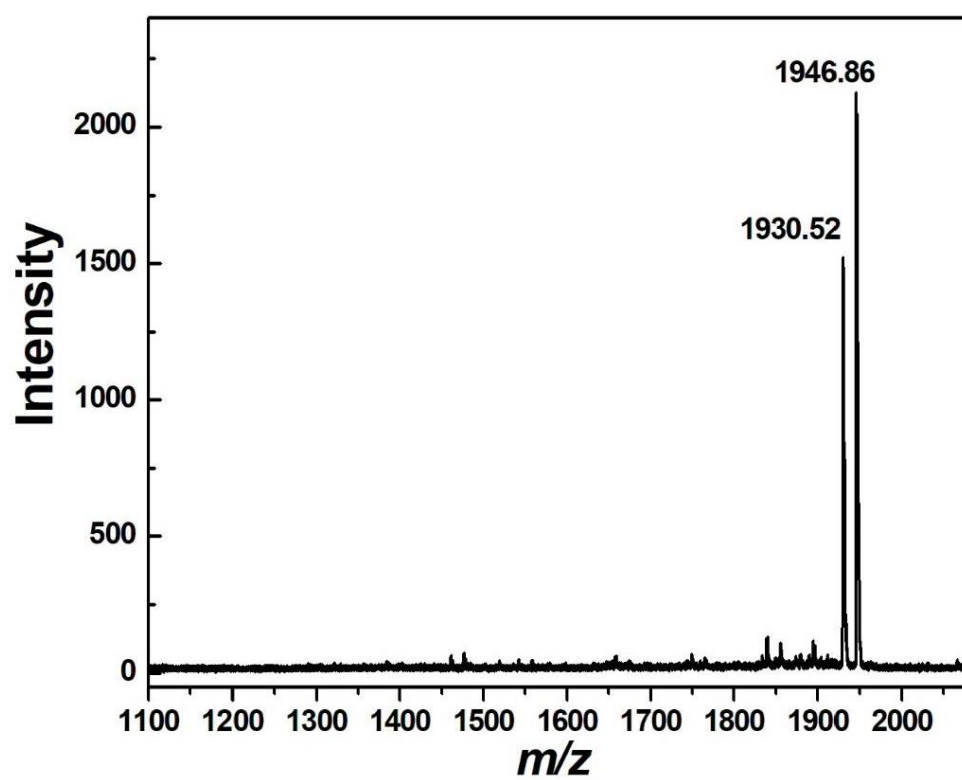

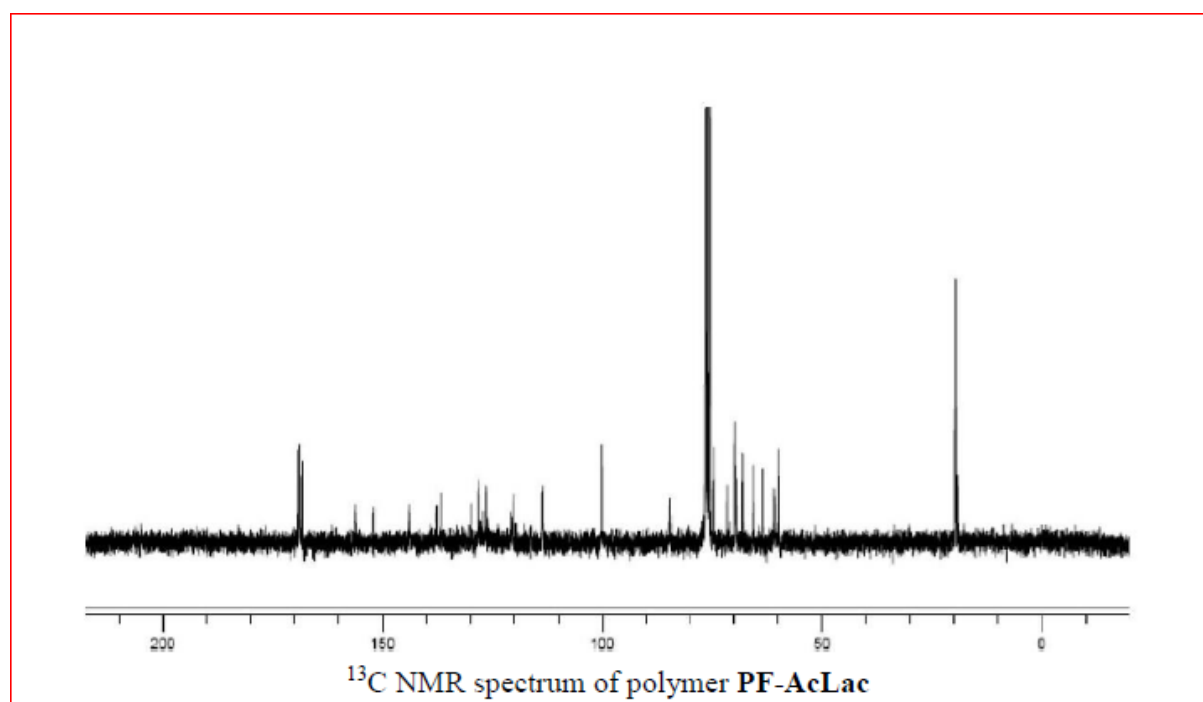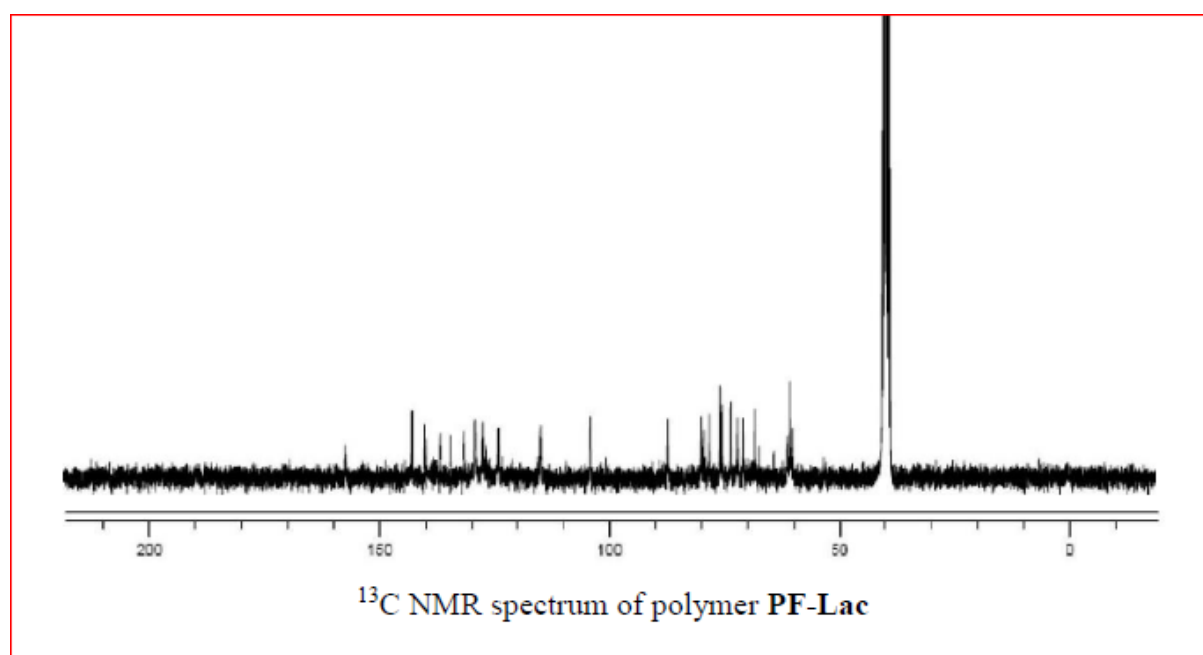

Supplement: Supplementary file [file 17427053]
